# Supplementary material
Source: publisher site journal article supplement (https://www.dovepress.com/article/448005)
Supplement: Supplementary file 1 [file get_supplementary_file.php]

# SUPPLEMENTARY INFORMATION


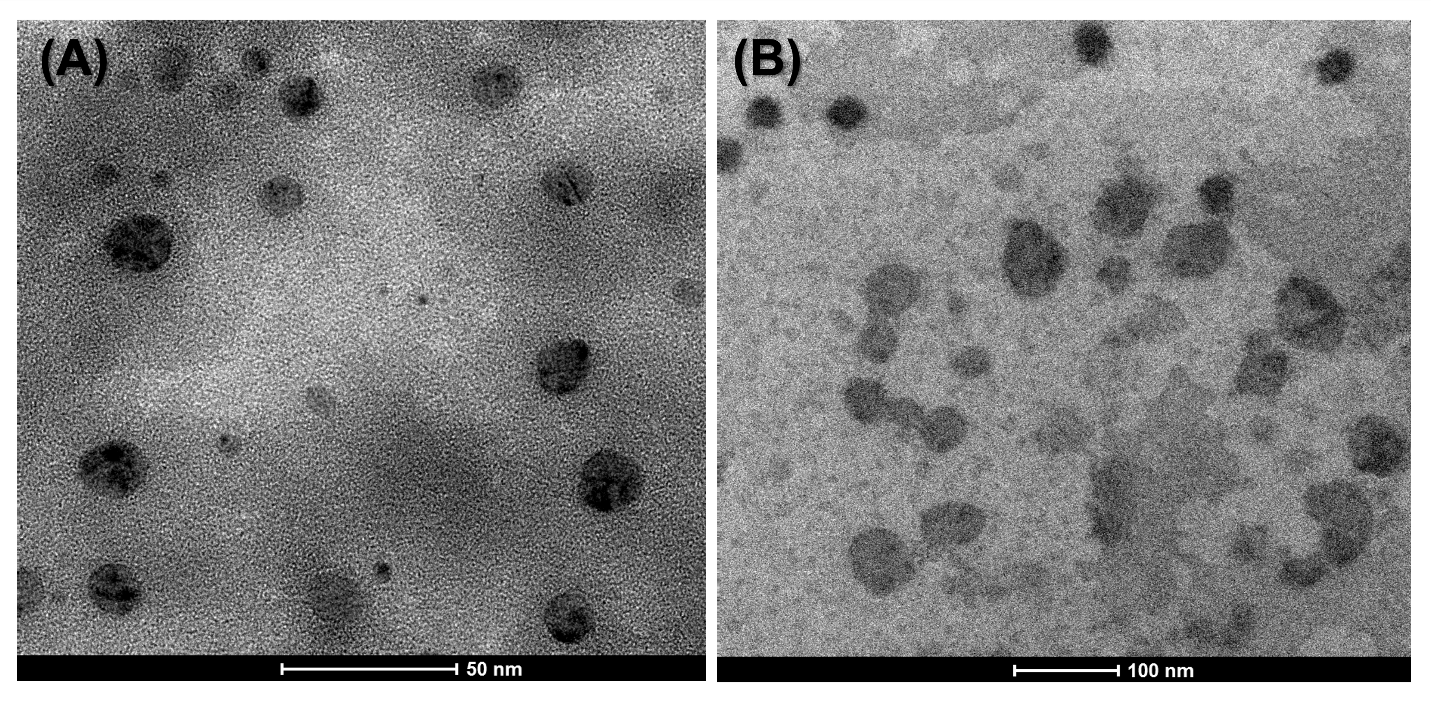


**Figure S1:** Representative transmission electron microscopic (TEM) images of A) LNP-Trim1 and B) LNP-Trap1.


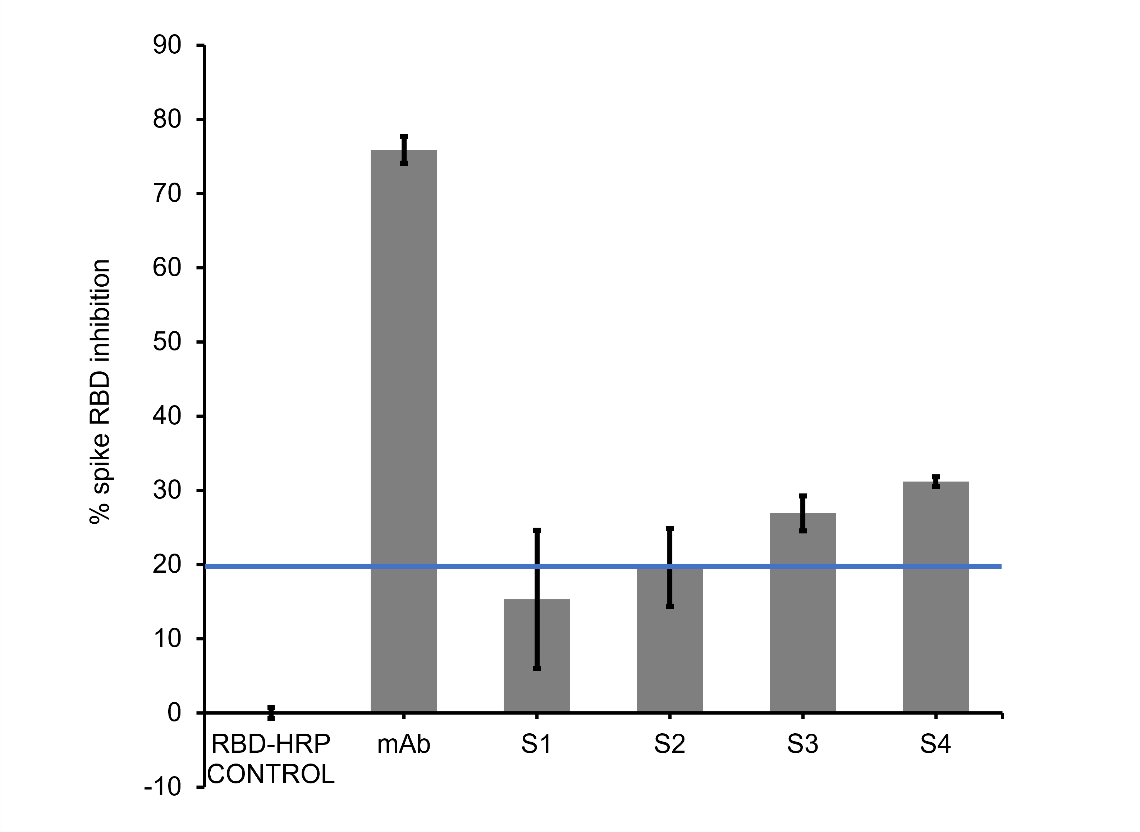


**Figure S2** Inhibition of SARS-CoV-2 RBD binding with hACE2 (coated plate) with the pre-incubation of the former with LNP-PEP with different lipid PEG and ACE2 peptide molar ratio – S1) DSPE-PEG-COOH (1.5 molar %) and ACE2 peptide (0.1 molar equivalent), S2) DSPE-PEG-COOH (1.5 molar %) and ACE2 peptide (0.3 molar equivalent), S3) DSPE-PEG-COOH (5 molar %) and ACE2 peptide (0.1 molar equivalent) and S4) LNP-PEG(5 molar %)-PEP(0.3 molar equivalent) as determined following ELISA. Percentage inhibition of >20% (Marked by the blue line in the graph) indicated a positive result for the SARS-CoV-2 spike protein binding antibody or LNP-trap. Values are expressed as the mean ± standard error of the mean (n = 3).


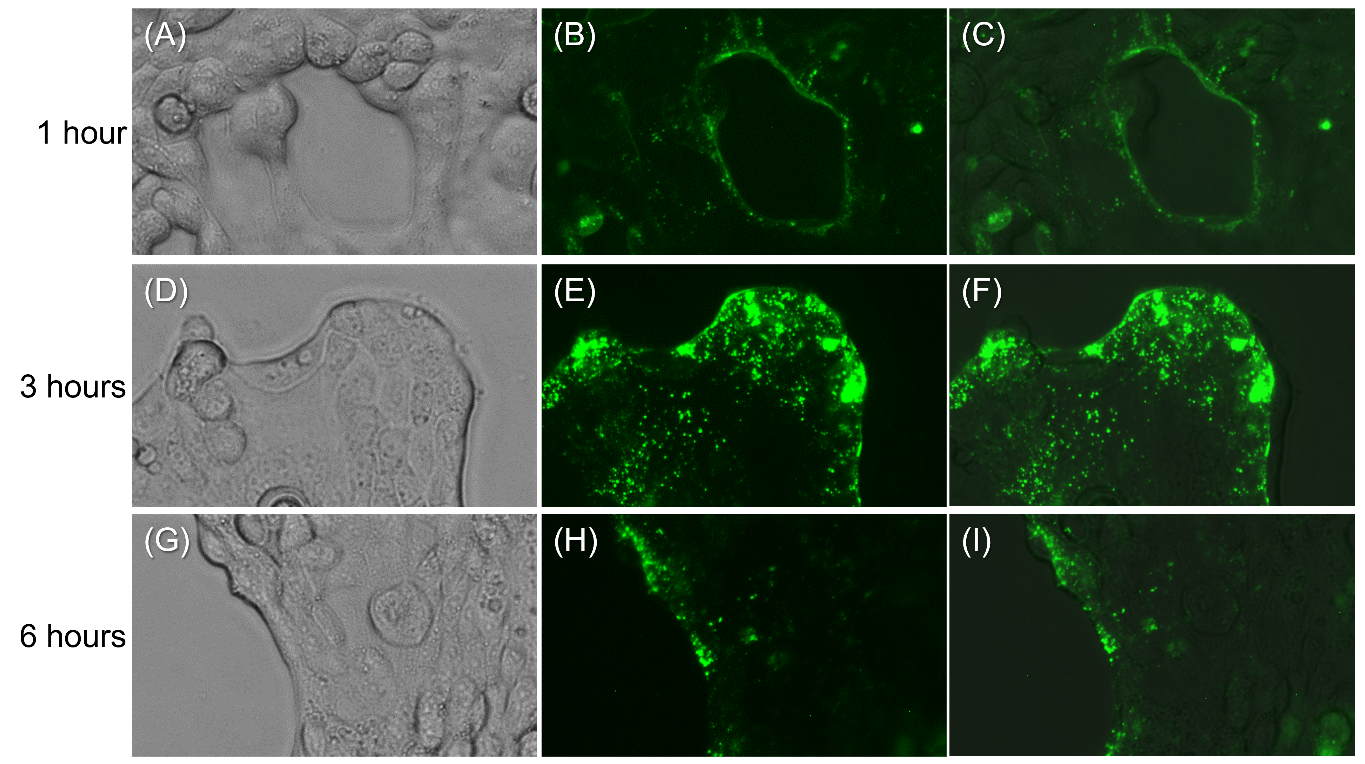


**Figure S3** Representative brightfield (Left panel) and green fluorescent (middle panel), and their overlayed images (40×) of Calu-3 cells transfected with green-fluorescent dye loaded LNP-si*ACE2* (40 nM) for one (A‒C), three (D‒F) and six (G‒I) hour(s) acquired using EVOS fluorescent cell imaging system. The LNPs can be seen accumulating inside cells as early as one hour. The green fluorescence can be seen in punctate form, indicating endosomal localization.


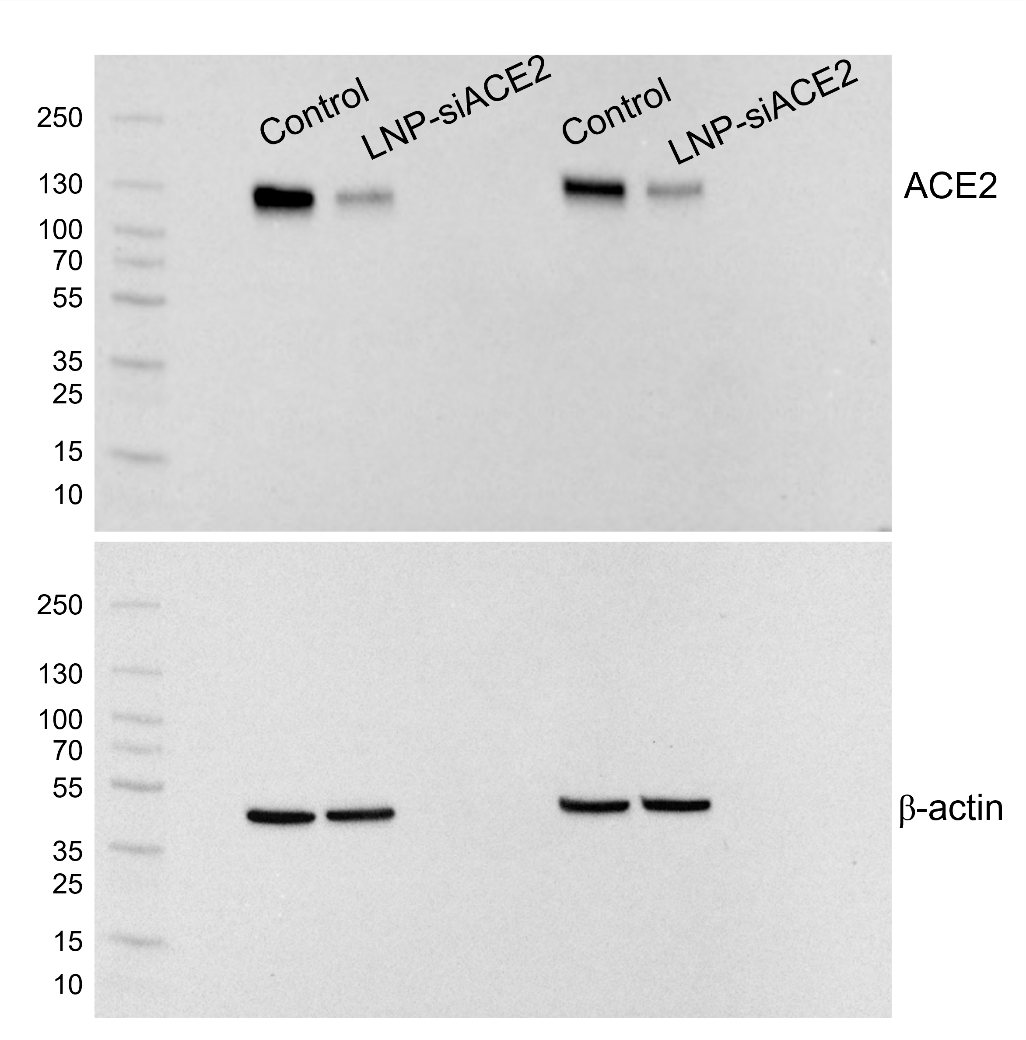


**Figure S4** The whole blots for the bands shown in Figure 5D of the manuscript. The top and bottom images show the immunoblotting for ACE2 and β-actin from the same membrane.


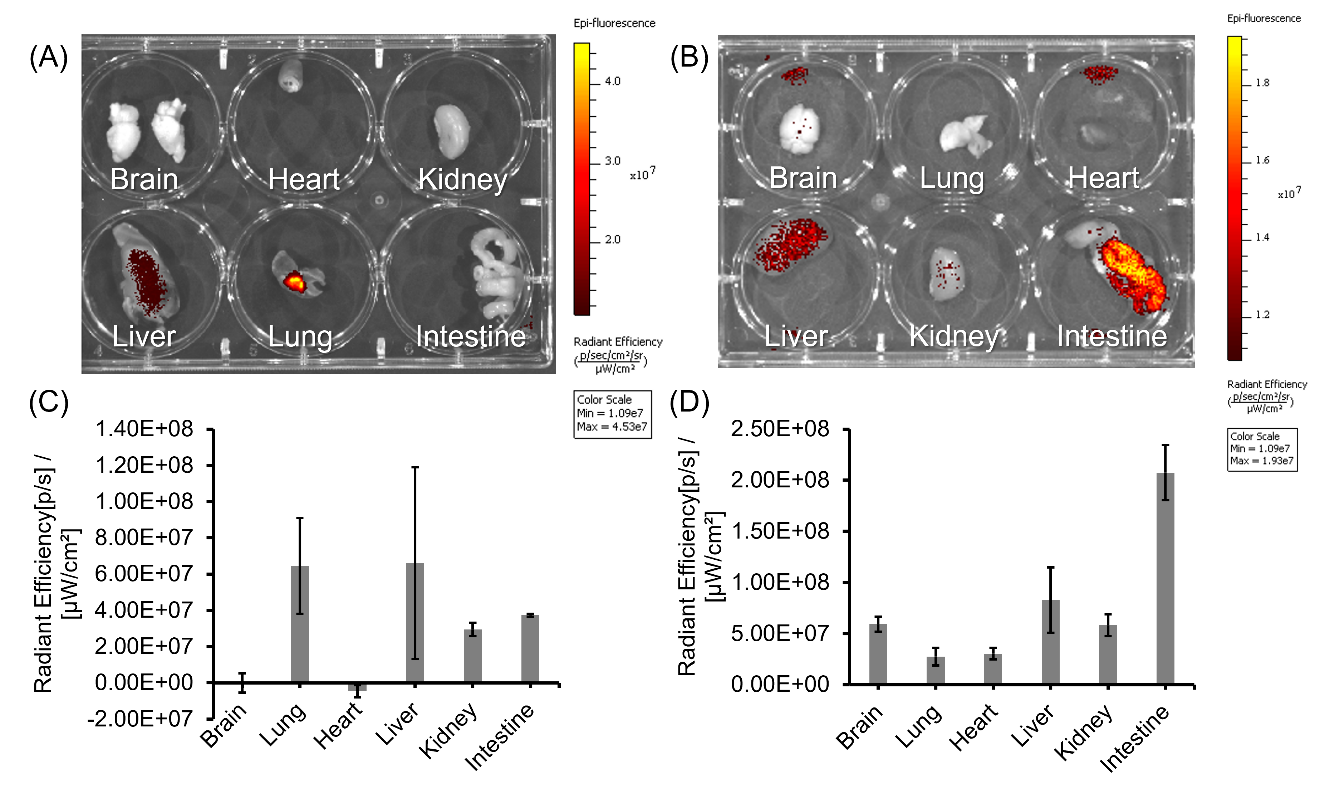


**Figure S5** Representativeex vivo IVIS images of organs 24 hours after intranasal administration of LNP-PEP (A) and LNP-siACE2 (B). Quantitative assessment of fluorescent-labeled LNP-PEP (C) and LNP-siACE2 (D) in various tissues 24 hours after intranasal administration. Values are expressed as the mean ± standard error of the mean (n = 4).

**Table S1**: The hydrodynamic size, zeta potential, and polydispersity index values of LNP formulations

| **LNP** | **Hydrodynamic size (nm)a** | **Zeta potential (mV)a** | **Polydispersity indexa** |
| --- | --- | --- | --- |
| LNP-COOH | 64.3 ± 1.3 | -15.2 ± 4.9 | 0.054 ± 0.020 |
| LNP-trap1 | 83.54 ± 1.9 | +0.68 ± 2.3 | 0.151 ± 0.038 |
| LNP-trap2 | 128.8 ± 2.5 | +1.08 ± 2.34 | 0.185 ± 0.060 |
| LNP-trap3 | 123.1 ± 3.68 | +0.04 ± 1.09 | 0.234 ± 0.078 |
| LNP-trim1 | 86.24 ± 1.93 | -0.13 ± 2.17 | 0.118 ± 0.045 |
| LNP-trim2 | 88.13 ± 1.54 | -0.01 ± 1.76 | 0.152 ± 0.023 |

aValues represent the average from three different fabrication runs in the microfluidic instrument.

**Table S2**: Listing of LNP (DOPC/DSPC/Cholesterol/DiR/DSPE-PEG-COOH ‒ 46.5/10/38/0.5/5 molar %) trap formulations prepared and their efficacy in inhibiting SARS-Cov-2 S pseudotyped luciferase lentivirus in airway epithelial Calu-3 cells.

|  | **Surface-bound trapping ligand** | **IC50 (**µg/mL) | **Maximum inhibition of infection (%)** |
| --- | --- | --- | --- |
| LNP-Trap1  LNP-Trap2  LNP-Trap3  Peptidea,d  rhACE2b,d  mAbc,d | peptidea  rhACE2b  mAbc  N/A  N/A  N/A | 0.39  0.0005  0.08  0.1  0.17  0.2 | > 90%  > 80%  > 95%  ~60%  ~70%  > 95% |

a SARS-CoV-2 spike-binding peptide.

b recombinant human ACE2 protein.

c human monoclonal antibody to spike protein.

d free molecule.

N/A - Not applicable as no LNPs were present, just the various trapping ligands in solution.
